# Supplementary material for: Well-defined, linear, wholly aromatic polymers with controlled content and position of pyridine moieties in macromolecules from one-pot, room temperature, metal-free step-polymerizations
Source: Royal Society of Chemistry journal article supplement (doi:10.1039/d0py00946f), 2020-01-01
Supplement: d0py00946f1.pdf [file d0py00946f1.pdf]

## Supporting information

### Well-defined, linear, wholly aromatic polymers with controlled content and position of pyridine moieties in macromolecules from one-pot, room temperature, metal-free step-polymerizations

Enoc Cetina-Mancilla<sup>a</sup>, Lilian I. Olvera<sup>\*a</sup>, Jorge Balmaseda<sup>a</sup>, Michael Forster<sup>b</sup>, F. Alberto Ruiz-Treviño<sup>c</sup>, Jorge Cárdenas<sup>d</sup>, Eduardo Vivaldo-Lima<sup>e</sup> and Mikhail G. Zolotukhin<sup>\*a</sup>

<sup>a</sup> Instituto de Investigaciones en Materiales, Universidad Nacional Autónoma de México, Apartado Postal 70-360, CU, Coyoacán 04510, Ciudad de México, México.

<sup>b</sup> Institute for Polymer Technology, Bergische Wuppertal University Gauss-Str. 20, D-42097 Wuppertal, Germany.

<sup>c</sup> Departamento de Ingeniería y Ciencias Químicas, Universidad Iberoamericana, Prol. Paseo de la Reforma No. 880, Lomas de Santa Fe, 01219 Ciudad de México, México.

<sup>d</sup> Instituto de Química, Universidad Nacional Autónoma de México, Apartado Postal 70-360, Ciudad Universitaria, Coyoacán, 04510 Ciudad de México, México

<sup>e</sup> Departamento de Ingeniería Química, Facultad de Química, Universidad Nacional Autónoma de México, 04510, Ciudad de México, México.

#### Supplementary spectrum.

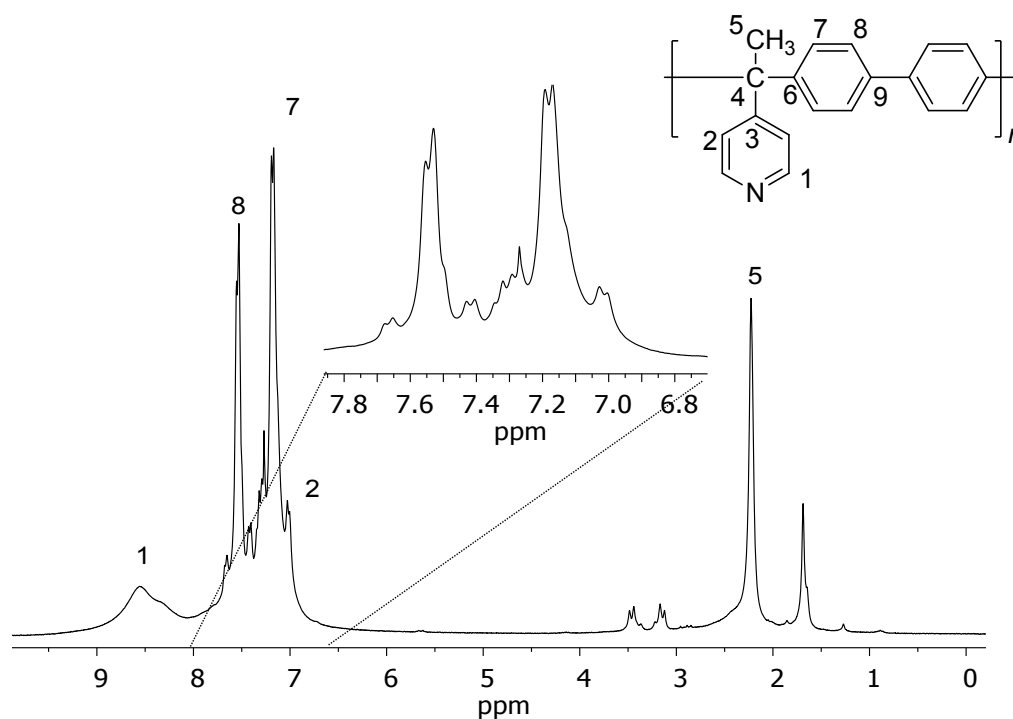

Figure S1. <sup>1</sup>H NMR spectrum of polymer **2aA** synthesized with an excess of trifluoroacetic acid
